# Supplementary material
Source: publisher figshare collection journal article supplement (https://acs.figshare.com/ndownloader/files/5079784)
Supplement: Supplementary file 1 [file 5079784]

**The first examples of Nazarov cyclisations leading to annulated pyrroles"**

David W. Knight, Chuanjun Song and Maria A. Whatton,

*School of Chemistry, Cardiff University, Main College, Park Place, Cardiff, CF10 3 AT, UK.*

[knightdw@cf.ac.uk]

A typical procedure is as follows: ***trans*-4,5-Dihydro-2,5-dimethyl-4-isopropyl-1-(4'-methylphenyl-sulfonyl)cyclopenta[b]-pyrrol-6(1H)-one 24d.**

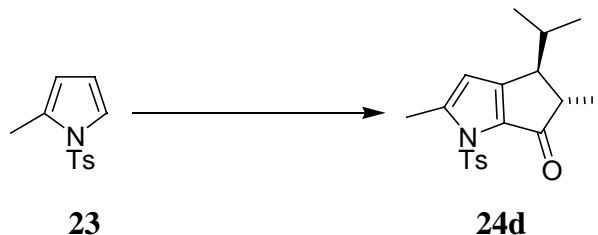

A solution of 2-methyl-*N*-tosylpyrrole [**23**; R<sup>1</sup> = Me] (55 mg, 0.23 mmol), 2,4-dimethylpent-2-enoic acid (118 mg, 0.92 mmol) and trifluoroacetic anhydride (0.5 ml) in dry dichloromethane (10 ml) was stirred at ambient temperature for 48 h then diluted with dichloromethane (20 ml). The resulting solution was washed with saturated aqueous sodium carbonate (10 ml) and brine (10 ml) then dried (MgSO<sub>4</sub>), filtered and evaporated. Column chromatography of the residue over silica gel eluted with petrol-ethyl acetate (4:1) separated the *cyclopentapyrrolone* **24d** as a clear, colourless oil (51 mg, 64%), which showed  $\nu_{\text{max}}$  (film) 1694, 1597, 1494, 1451, 1377, 1193, 1137, 1089, 1042 cm<sup>-1</sup>,  $\delta_{\text{H}}$  (CDCl<sub>3</sub>, 400 MHz) 0.90 (3H, d, *J* 6.8 Hz, <sup>i</sup>Pr-Me), 0.91 (3H, d, *J* 6.8 Hz, <sup>i</sup>Pr-Me), 1.25 (3H, d, *J* 7.4 Hz, 5-Me), 1.19-1.88 (1H, m, <sup>i</sup>Pr-H), 2.41-2.43 (4H, m, Ts-Me and 4-H), 2.55 (1H, qd, *J* 7.4 and 2.3 Hz, 5-H), 2.59 (3H, s, 2-Me), 6.00 (1H, s, 3-H), 7.31 (2H, d, *J* 8.3 Hz, 2 x Ar-H), 8.05 (2H, d, *J* 8.3 Hz, 2 x Ar-H),  $\delta_{\text{C}}$  (CDCl<sub>3</sub>, 100 MHz) 15.7, 17.3, 19.9, 20.3 (all Me), 21.7 (Ts-Me), 31.3 (CHMe<sub>2</sub>), 48.8 (4-CH), 51.1 (5-CH), 110.4 (3-CH), 127.8 (2 x Ar-CH), 129.9 (2 x Ar-CH), 133.4, 136.0, 145.3, 145.9, 158.0 (all C), 190.4 (CO), *m/z* (APCI) 346 (M<sup>+</sup> + H, 100%). [Found: M<sup>+</sup> + H, 346.1474. C<sub>19</sub>H<sub>24</sub>NO<sub>3</sub>S requires 346.1471].

**4,5-Dihydro-4,4-dimethyl-1-(4'-methylphenylsulfonyl)cyclopenta[b]pyrrol-6(1H)-one (17)**

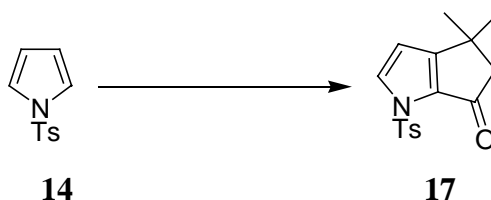

A brown oil, which showed:  $R_f$  0.19 (petroleum ether-ethyl acetate 3:1);  $\nu_{\max}/\text{cm}^{-1}$  [film] 1694 (C=O), 1596, 1447, 1422, 1370, 1177, 1154 and 1057;  $\delta_H$  8.01 (2H, d,  $J$  8.3, 2'- and 6'-H), 7.53 (1H, d,  $J$  3.1, 2-H), 7.26 (2H, d,  $J$  8.3, 3'- and 5'-H), 6.14 (1H, d,  $J$  3.1, 3-H), 2.64 (2H, s, 5-CH<sub>2</sub>), 2.35 (3H, s, *Ts*-Me) and 1.23 (6H, s, 2 x (4-Me));  $\delta_C$  187.7 (C=O), 167.7, 145.7, 134.9 (all C), 133.6 (2-CH), 131.3 (C), 129.9 (2'- and 6'-CH), 128.4 (3'- and 5'-CH), 106.4 (3-CH), 57.5 (5-CH<sub>2</sub>), 34.5 (4-C), 29.0 (2 x (4-Me)) and 21.8 (*Ts*-Me);  $m/z$  (APCI) 304 ( $M^+ + H$ , 80%), 112 (15), 86 (15) and 72 (100) [Found:  $M^+ + H$ , 304.1000. C<sub>16</sub>H<sub>18</sub>NO<sub>3</sub>S requires 304.1002].

**(*E*)-1-[1'-(4''-Methylphenylsulfonyl)pyrrol-2'-yl]but-2-en-1-one (18a)**

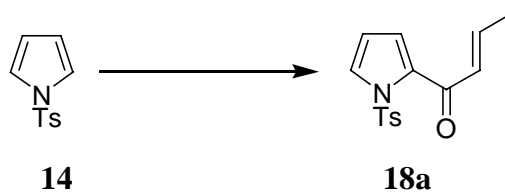

A orange oil, which showed:  $R_f$  0.29 (petroleum ether-ethyl acetate 3:1);  $\nu_{\max}/\text{cm}^{-1}$  [film] 1668 (C=O), 1625, 1597, 1541, 1494, 1440, 1401, 1367, 1302, 1245, 1174, 1145, 1091 and 1053;  $\delta_H$  7.85 (2H, d,  $J$  8.3, 2''- and 6''-H), 7.70 (1H, dd,  $J$  3.2 and 1.7, 5'-H), 7.24 (2H, d,  $J$  8.3, 3''- and 5''-H), 6.92 (1H, dd,  $J$  3.8 and 1.7, 3'-H), 6.86 (1H, dq,  $J$  15.4 and 6.9, 3-H), 6.50 (1H, dq,  $J$  15.4 and 1.6, 2-H), 6.26 (1H, *app. t*,  $J$  *ca.* 3.4, 4'-H), 2.33 (3H, s, *Ts*-Me) and 1.82 (3H, dd,  $J$  6.9 and 1.6, 3-Me);  $\delta_C$  179.1 (C=O), 144.7 (C), 144.1 (3-CH), 136.2, 133.9 (both C), 130.0 (5'-CH), 129.4 (2''- and 6''-CH), 128.2 (3''- and 5''-CH), 128.1, 123.1 (both CH),

110.4 (4'-CH), 21.7 (*Ts*-Me) and 18.4 (3-Me); *m/z* (APCI) 290 ( $M^+ + H$ , 100%) [Found:  $M^+ + H$ , 290.0846.  $C_{15}H_{16}NO_3S$  requires 290.0845].

**(*E*)-1-[1'-(4''-Methylphenylsulfonyl)pyrrol-2'-yl]-3-phenylprop-2-en-1-one (18b) and 3-phenyl-1,3-bis[1'-(4''-methylphenylsulfonyl)pyrrol-2'-yl]propan-1-one (19)**

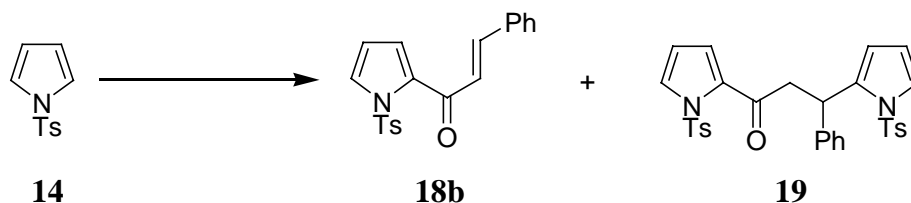

The *propenone* **18b** showed:  $R_f$  0.24 (petroleum ether-ethyl acetate 3:1); mp 111-113 °C;  $\nu_{\max}/\text{cm}^{-1}$  [KBr] 1658 (C=O), 1605, 1435, 1401, 1348, 1184, 1146, 1054 and 975;  $\delta_H$  7.85 (2H, d,  $J$  8.3, 2''- and 6''-H), 7.72 (1H, dd,  $J$  3.1 and 1.7, 5'-H), 7.55 (1H, d,  $J$  15.8, 3-H), 7.42-7.40 (2H, m, both Ar-H), 7.25-7.23 (3H, m, all Ar-H), 7.20 (2H, d,  $J$  8.3, 3''- and 5''-H), 7.09 (1H, d,  $J$  15.8, 2-H), 7.03 (1H, dd,  $J$  3.7 and 1.7, 3'-H), 6.26 (1H, *app. t*,  $J$  *ca.* 3.4, 4'-H) and 2.27 (3H, s, *Ts*-Me);  $\delta_C$  178.6 (C=O), 144.9 (C), 143.8 (3-CH), 136.2, 134.6, 134.4 (all C), 130.5, 130.4 (both CH), 129.5 (2 x CH), 129.0 (2 x CH), 128.4 (2 x CH), 128.3 (2 x CH), 123.5, 122.8 (both CH), 110.7 (4'-CH) and 21.8 (*Ts*-Me); *m/z* (APCI) 352 ( $M^+ + H$ , 100%) and 108 (70) [Found:  $M^+ + H$ , 352.1003.  $C_{20}H_{18}NO_3S$  requires 352.1002].

The *dipyrrolylpropanone* **19** showed:  $R_f$  0.19 (petroleum ether-dichloromethane 1:10);  $\nu_{\max}/\text{cm}^{-1}$  [film] 1676 (C=O), 1596, 1438, 1365, 1174, 1145, 1091 and 1063;  $\delta_H$  7.71-7.68 (3H, m, 5 $_{\alpha}$ -pyrrole-, 2 $_{\alpha}$ -*Ts*- and 6 $_{\alpha}$ -*Ts*-H), 7.29 (2H, d,  $J$  8.3, 2 $_{\beta}$ -*Ts*- and 6 $_{\beta}$ -*Ts*-H), 7.15-7.13 (3H, m, 3 $_{\alpha}$ -*Ts*-, 5 $_{\alpha}$ -*Ts*- and 5 $_{\beta}$ -pyrrole-H), 7.03-6.96 (5H, m, all Ar-H), 6.86 (1H, dd,  $J$  3.6 and 1.6, 3 $_{\alpha}$ -pyrrole-H), 6.83-6.81 (2H, m, both Ar-H), 6.19 (1H, t,  $J$  3.6, 4 $_{\alpha}$ -pyrrole-H), 6.08 (1H, t,  $J$  3.4, 4 $_{\beta}$ -pyrrole-H), 5.98-5.97 (1H, m, *br.res.*, 3 $_{\beta}$ -pyrrole-H), 5.08 (1H, t,  $J$  7.5, 3-H), 3.16 (1H, dd,  $J$  15.9 and 7.5, 2-H $_{\alpha}$ ), 3.06 (1H, dd,  $J$  15.9 and 7.5, 2-H $_{\beta}$ ), 2.34 (3H, s, *Ts*-Me $_{\alpha}$ ) and 2.27 (3H, s, *Ts*-Me $_{\beta}$ );  $\delta_C$  185.1 (C=O), 144.7, 144.3, 142.3, 136.6, 136.2, 135.5, 133.0 (all C), 130.3 (CH), 129.7 (2 x CH), 129.2 (2 x CH), 128.4 (2 x CH), 128.2 (2 x CH), 127.8 (2 x CH), 126.8 (2 x CH), 126.3, 123.4, 123.0, 112.9 111.3, 110.2 (all CH), 46.6 (2-CH $_2$ ), 38.8 (3-CH), 21.8 and 21.6 (both *Ts*-Me); *m/z* (APCI) 573 ( $M^+ + H$ , 25%), 310

(10), 261 (10), 250 (10), 156 (20), 140 (30), 123 (45) and 108 (100) [Found:  $M^+ + H$ , 573.1517.  $C_{31}H_{29}N_2O_5S_2$  requires 573.1512].

**4,5-Dihydro-5-methyl-1-(4'-methylphenylsulfonyl)cyclopenta[*b*]pyrrol-6(1*H*)-one (21a)**

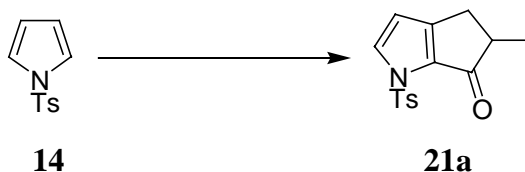

A pale orange solid, which showed:  $R_f$  0.25 (petroleum ether-ethyl acetate 3:1); mp 126-128 °C;  $\nu_{\max}/\text{cm}^{-1}$  [KBr] 1697 (C=O), 1377, 1174 and 1136;  $\delta_H$  7.99 (2H, d,  $J$  8.3, 2'- and 6'-H), 7.57 (1H, d,  $J$  3.1, 2-H), 7.23 (2H, d,  $J$  8.3, 3'- and 5'-H), 6.15 (1H, d,  $J$  3.1, 3-H), 2.93 (1H, dd,  $J$  17.1 and 6.6, 4- $H_\alpha$ ), 2.84-2.76 (1H, m, 5-H), 2.32 (3H, s,  $Ts$ -Me), 2.29 (1H, dd,  $J$  17.1 and 2.5, 4- $H_\beta$ ) and 1.18 (3H, d,  $J$  7.5, 5-Me);  $\delta_C$  191.7 (C=O), 157.2, 145.7, 134.9 (all C), 133.7 (2-CH), 132.8 (C), 129.9 (2'- and 6'-CH), 128.3 (3'- and 5'-CH), 108.9 (3-CH), 47.6 (5-CH), 29.4 (4- $CH_2$ ), 21.7 ( $Ts$ -Me) and 16.9 (5-Me);  $m/z$  (APCI) 290 ( $M^+ + H$ , 100%) [Found:  $M^+ + H$ , 290.0844.  $C_{15}H_{16}NO_3S$  requires 290.0845].

***trans*- and *cis*-4,5-Dihydro-4,5-dimethyl-1-(4'-methylphenylsulfonyl)cyclopenta[*b*]pyrrol-6(1*H*)-one (21b)**

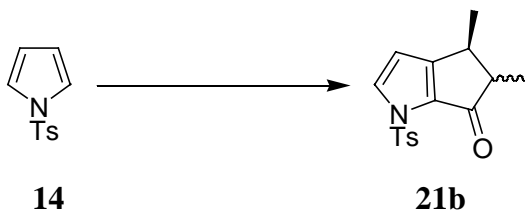

A mixture of *cis*- and *trans*-isomers in a ratio of 1:2, as a syrup, which showed:  $R_f$  0.29 (petroleum ether-dichloromethane 1:3);  $\nu_{\max}/\text{cm}^{-1}$  [film] 1694 (C=O), 1596, 1447, 1425, 1378, 1227, 1175, 1146, 1130, 1089, 1062, 1018 and 921;  $\delta_H$  8.01-7.97 (2H, m, 2'- and 6'-H, both isomers), 7.55 (1H, d,  $J$  3.0, 2-H, both isomers), 7.24 (2H, d,  $J$  8.2, 3'- and 5'-H, both isomers), 6.17-6.15 (1H, m, 3-H, both isomers), 3.12 (0.33H, *app.* quint,  $J$  *ca.* 7.0, 5-H, *cis*-isomer), 2.89 (0.33H, *app.* quint,  $J$  *ca.* 7.2, 4-H, *cis*-isomer), 2.58 (0.67H, qd,  $J$  7.0 and 2.7, 5-H, *trans*-isomer), 2.35-2.32 (3.67H, m, 4-H for *trans*-isomer and  $Ts$ -Me for both isomers), 1.19 (2H, d,  $J$  7.0, 5-Me, *trans*-isomer), 1.16 (2H, d,  $J$  7.5, 4-Me, *trans*-isomer), 1.07 (1H, d,  $J$  7.7, 4-Me, *cis*-

isomer) and 1.04 (1H, d, *J* 7.3, 5-Me, *cis*-isomer);  $\delta_{\text{C}}$  191.6 (C=O, *cis*-isomer), 190.8 (C=O, *trans*-isomer), 163.1 (*cis*-isomer), 161.5 (*trans*-isomer), 145.7 (*trans*-isomer), 145.7 (*cis*-isomer), 134.9 (*cis*-isomer), 134.9 (*trans*-isomer) (all C), 133.6 (2-CH, *trans*-isomer), 133.6 (2-CH, *cis*-isomer), 132.0 (C, *trans*-isomer), 131.9 (C, *cis*-isomer), 129.9 (2'- and 6'-CH, both isomers), 128.3 (3'- and 5'-CH, *trans*-isomer), 128.3 (3'- and 5'-CH, *cis*-isomer), 107.9 (3-CH, *cis*-isomer), 107.7 (3-CH, *trans*-isomer), 56.6 (5-CH, *trans*-isomer), 51.0 (5-CH, *cis*-isomer), 37.0 (4-CH, *trans*-isomer), 31.7 (4-CH, *cis*-isomer), 21.7 (*Ts*-Me, both isomers), 18.7 (5-Me, *trans*-isomer), 16.3 (5-Me, *cis*-isomer), 14.8 (4-Me, *trans*-isomer) and 11.9 (4-Me, *cis*-isomer); *m/z* (APCI) 304 ( $\text{M}^+ + \text{H}$ , 100%) [Found:  $\text{M}^+ + \text{H}$ , 304.1004.  $\text{C}_{16}\text{H}_{18}\text{NO}_3\text{S}$  requires 304.1002].

***trans*- and *cis*-4,5-Dihydro-5-methyl-1-(4'-methylphenylsulfonyl)-4-phenylcyclopenta[*b*]-pyrrol-6(1*H*)-one (21c)**

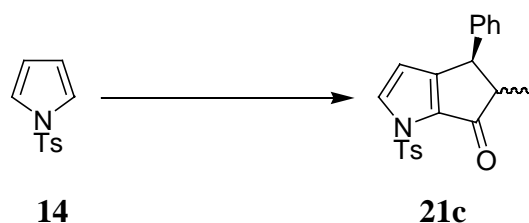

A mixture of *trans*- and *cis*-isomers in a ratio 6:1, as a syrup, which showed:  $R_{\text{f}}$  0.33 (petroleum ether-ethyl acetate 3:1);  $\nu_{\text{max}}/\text{cm}^{-1}$  [film] 1698 (C=O), 1596, 1494, 1454, 1423, 1376, 1192, 1175, 1139, 1088, 1047 and 1004;  $\delta_{\text{H}}$  8.04-8.01 (2H, m, 2'- and 6'-H, both isomers), 7.63 (0.14H, d, *J* 3.1, 2-H, *cis*-isomer), 7.60 (0.86H, d, *J* 3.0, 2-H, *trans*-isomer), 7.29-7.13 (5H, m, all Ar-H, both isomers), 7.04-7.01 (2H, m, Ar-H, both isomers), 6.09 (0.14H, d, *J* 3.1, 3-H, *cis*-isomer), 6.04 (0.86H, d, *J* 3.0, 3-H, *trans*-isomer), 4.32 (0.14H, d, *J* 6.8, 4-H, *cis*-isomer), 3.69 (0.86H, d, *J* 3.3, 4-H, *trans*-isomer), 3.12 (0.14H, *app.* quint, *J* *ca.* 7.3, 5-H, *cis*-isomer), 2.65 (0.86H, qd, *J* 7.4 and 3.3, 5-H, *trans*-isomer), 2.36 (0.43H, s, *Ts*-Me, *cis*-isomer), 2.34 (2.57H, s, *Ts*-Me, *trans*-isomer), 1.24 (2.57H, d, *J* 7.4, 5-Me, *trans*-isomer) and 0.65 (0.43H, d, *J* 7.7, 5-Me, *cis*-isomer);  $\delta_{\text{C}}$  191.2 (C=O, *cis*-isomer), 190.3 (C=O, *trans*-isomer), 159.1 (*cis*-isomer), 158.7 (*trans*-isomer), 145.9 (*trans*-isomer), 141.2 (*trans*-isomer), 134.9 (*trans*-isomer) (all C), 134.1 (CH, *cis*-isomer), 133.9 (CH, *trans*-isomer), 132.9 (C, *trans*-isomer), 130.1 (2 x CH, both isomers), 128.9 (2 x CH, *cis*-isomer), 128.9 (2 x CH, *trans*-isomer), 128.4 (2 x CH, *trans*-isomer), 128.4 (2 x CH, *cis*-isomer), 127.3 (2 x CH, both isomers), 127.1 (CH, both isomers), 109.0 (3-CH, *cis*-isomer), 108.6 (3-CH, *trans*-isomer), 58.5 (4-CH, *trans*-isomer), 52.4 (4-CH, *cis*-isomer), 48.4 (5-CH, *trans*-isomer), 43.9 (5-CH, *cis*-isomer), 21.8 (*Ts*-Me, both isomers), 14.8 (5-Me, *trans*-isomer) and 13.9 (5-Me, *cis*-isomer); *m/z* (APCI) 366 ( $\text{M}^+ + \text{H}$ , 100%) [Found:  $\text{M}^+ + \text{H}$ , 366.1161.  $\text{C}_{21}\text{H}_{20}\text{NO}_3\text{S}$  requires 366.1158].

**Cyclohex-1''-en-1''-yl-[1-(4'-methylphenylsulfonyl)pyrrol-2-yl]methanone (22)**

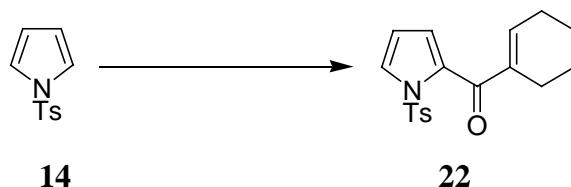

A pale orange solid, which showed:  $R_f$  0.32 (petroleum ether-ethyl acetate 5:1); mp 126-128 °C;  $\nu_{\max}/\text{cm}^{-1}$  [KBr] 1638 (C=O), 1596, 1448, 1366, 1311, 1249, 1171, 1146, 1088 and 1059;  $\delta_H$  7.97 (2H, d,  $J$  8.3, 2'- and 6'-H), 7.59 (1H, dd,  $J$  3.1 and 1.7, 5-H), 7.34 (2H, d,  $J$  8.3, 3'- and 5'-H), 6.81-6.79 (1H, m, 2''-H), 6.60 (1H, dd,  $J$  3.5 and 1.7, 3-H), 6.27 (1H, *app. t*,  $J$  *ca.* 3.4, 4-H), 2.41 (3H, s, *Ts*-Me), 2.33-2.31 (2H, m, *br. res.*, 6''-CH<sub>2</sub>), 2.26-2.24 (2H, m, *br. res.*, 3''-CH<sub>2</sub>) and 1.71-1.63 (4H, m, 4''- and 5''-CH<sub>2</sub>);  $\delta_C$  186.9 (C=O), 144.9 (C), 144.0 (2''-CH), 139.5, 136.3, 133.0 (all C), 129.5 (2'- and 6'-CH), 128.2 (3'- and 5'-CH), 127.6 (5-CH), 122.0 (3-CH), 110.5 (4-CH), 26.1 (6''-CH<sub>2</sub>), 23.6 (3''-CH<sub>2</sub>), 21.9 (CH<sub>2</sub>), 21.7 (*Ts*-Me) and 21.6 (CH<sub>2</sub>);  $m/z$  (APCI) 330 ( $M^+ + H$ , 100%) [Found:  $M^+ + H$ , 330.1163. C<sub>18</sub>H<sub>20</sub>NO<sub>3</sub>S requires 330.1158].

***trans*- and *cis*-4,5-Dihydro-1-(4'-methylphenylsulfonyl)-2,4,5-trimethylcyclopenta[*b*]-pyrrol-6(1*H*)-one (24a)**

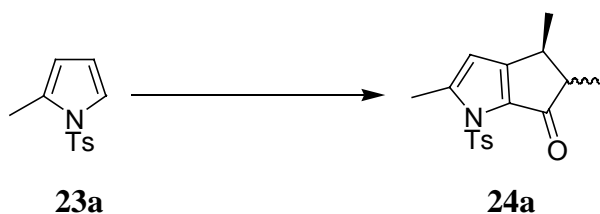

A mixture of *trans*- and *cis*-isomers in a ratio 6:1, as a syrup, which showed:  $R_f$  0.22 (petroleum ether-ethyl acetate 3:1);  $\nu_{\max}/\text{cm}^{-1}$  [film] 1695 (C=O), 1597, 1493, 1459, 1375, 1277, 1239, 1181, 1141, 1091, 1049, 1010, 985, 927 and 816;  $\delta_H$  8.00-7.96 (2H, m, 2'- and 6'-H, both isomers), 7.23-7.21 (2H, m, 3'- and 5'-H, both isomers), 5.91 (0.14H, s, 3-H, *cis*-isomer), 5.90 (0.86H, s, 3-H, *trans*-isomer), 3.04 (0.14H, *app. quint*,  $J$  *ca.* 7.0, 5-H, *cis*-isomer), 2.86 (0.14H, *app. quint*,  $J$  *ca.* 7.6, 4-H, *cis*-isomer), 2.49 (0.86H, qd,  $J$  7.2 and 2.9, 5-H, *trans*-isomer), 2.49 (2.57H, s, 2-Me, *trans*-isomer), 2.48 (0.43H, s, 2-Me, *cis*-isomer), 2.31 (2.57H, s,

*Ts*-Me, *trans*-isomer), 2.30 (0.43H, s, *Ts*-Me, *cis*-isomer), 2.29 (0.86H, qd, *J* 7.4 and 2.9, 4-H, *trans*-isomer), 1.15 (2.57H, d, *J* 7.4, 4-Me, *trans*-isomer), 1.14 (2.57H, d, *J* 7.2, 5-Me, *trans*-isomer), 1.06 (0.43H, d, *J* 7.6, 4-Me, *cis*-isomer) and 0.99 (0.43H, d, *J* 7.4, 5-Me, *cis*-isomer);  $\delta_{\text{C}}$  190.6 (C=O, *cis*-isomer), 189.8 (C=O, *trans*-isomer), 161.7 (*cis*-isomer), 160.1 (*trans*-isomer), 146.2 (*trans*-isomer), 146.1 (*cis*-isomer), 145.4 (*trans*-isomer), 145.3 (*cis*-isomer), 136.0 (*cis*-isomer), 136.0 (*trans*-isomer), 132.6 (*trans*-isomer), 132.5 (*cis*-isomer) (all C), 129.9 (2'- and 6'-CH, both isomers), 127.8 (3'- and 5'-CH, *trans*-isomer), 127.8 (3'- and 5'-CH, *cis*-isomer), 109.1 (3-CH, *cis*-isomer), 109.0 (3-CH, *trans*-isomer), 56.2 (5-CH, *trans*-isomer), 50.7 (5-CH, *cis*-isomer), 36.5 (4-CH, *trans*-isomer), 31.2 (4-CH, *cis*-isomer), 21.7 (*Ts*-Me, both isomers), 18.8 (Me, *trans*-isomer), 16.2 (Me, *cis*-isomer), 15.6 (Me, both isomers), 15.1 (Me, *trans*-isomer) and 12.0 (Me, *cis*-isomer); *m/z* (APCI) 318 ( $\text{M}^+ + \text{H}$ , 100%) [Found:  $\text{M}^+ + \text{H}$ , 318.1157.  $\text{C}_{17}\text{H}_{20}\text{NO}_3\text{S}$  requires 318.1158].

***trans*- and *cis*-4,5-Dihydro-4,5-dimethyl-1-(4'-methylphenylsulfonyl)-2-phenyl-cyclopenta[*b*]pyrrol-6(1*H*)-one (24b)**

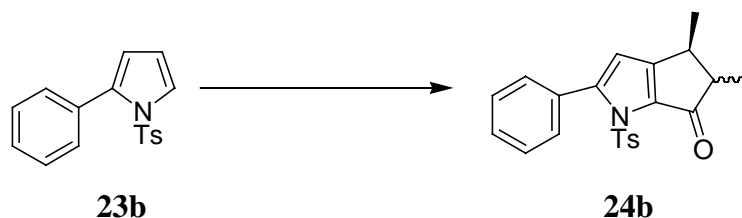

A mixture of *trans*- and *cis*-isomers in a ratio of 6:1, as a syrup, which showed:  $R_f$  0.17 (petroleum ether-ethyl acetate 5:1);  $\nu_{\text{max}}/\text{cm}^{-1}$  [film] 1699 (C=O), 1596, 1464, 1383, 1192, 1180, 1127, 1090 and 1019;  $\delta_{\text{H}}$  7.77-7.73 (2H, m, 2'- and 6'-H, both isomers), 7.39-7.22 (5H, m, all Ar-H, both isomers), 7.18 (2H, d, *J* 8.1, 3'- and 5'-H, both isomers), 6.09 (0.14H, s, 3-H, *cis*-isomer), 6.08 (0.86H, s, 3-H, *trans*-isomer), 3.14 (0.14H, *app.* quint, *J ca.* 7.1, 5-H, *cis*-isomer), 2.96 (0.14H, *app.* quint, *J ca.* 7.5, 4-H, *cis*-isomer), 2.59 (0.86H, qd, *J* 7.1 and 2.9, 5-H, *trans*-isomer), 2.40 (0.86H, qd, *J* 7.4 and 2.9, 4-H, *trans*-isomer), 2.32 (3H, s, *Ts*-Me, both isomers), 1.22 (2.57H, d, *J* 7.4, 4-Me, *trans*-isomer), 1.21 (2.57H, d, *J* 7.1, 5-Me, *trans*-isomer), 1.12 (0.43H, d, *J* 7.6, 4-Me, *cis*-isomer) and 1.06 (0.43H, d, *J* 7.4, 5-Me, *cis*-isomer);  $\delta_{\text{C}}$  191.8 (C=O, *cis*-isomer), 191.1 (C=O, *trans*-isomer), 162.1 (*cis*-isomer), 160.5 (*trans*-isomer), 149.7 (both isomers), 145.3 (both isomers), 135.9 (both isomers), 134.4 (both isomers), 131.6 (both isomers) (all C), 129.8 (2 x CH, both isomers), 129.7 (2 x CH, both isomers), 129.3 (Ar-CH, both isomers), 128.1 (2 x CH, both isomers), 127.7 (2 x CH, both isomers), 111.3 (3-CH, *cis*-isomer), 111.1 (3-CH, *trans*-isomer), 56.3 (5-CH, *trans*-isomer), 50.9 (5-CH, *cis*-isomer), 36.7 (4-CH, *trans*-isomer), 31.5 (4-CH, *cis*-isomer), 21.8 (*Ts*-Me, both isomers), 18.9

(Me, *trans*-isomer), 16.3 (Me, *cis*-isomer), 15.2 (Me, *trans*-isomer) and 12.1 (Me, *cis*-isomer);  $m/z$  (APCI) 380 ( $M^+ + H$ , 100%) [Found:  $M^+ + H$ , 380.1313.  $C_{22}H_{22}NO_3S$  requires 380.1315].

**4,5-Dihydro-2,5-dimethyl-1-(4'-methylphenylsulfonyl)cyclopenta[*b*]pyrrol-6(1*H*)-one (24c) and 5,6-dihydro-2,5-dimethyl-1-(4'-methylphenylsulfonyl)cyclopenta[*b*]pyrrol-4(1*H*)-one**

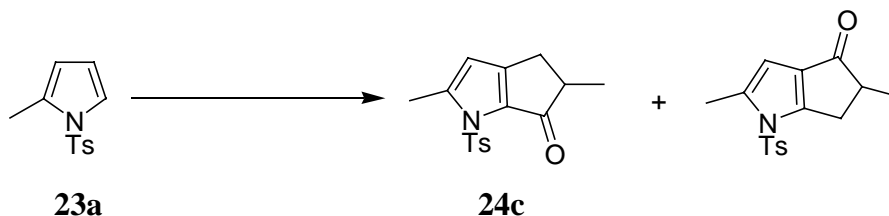

A solution of 2-methyl-*N*-tosylpyrrole **23a** (70 mg, 0.3 mmol, 1.0 eq), methacrylic acid (77 mg, 0.9 mmol, 3.0 eq) and trifluoroacetic anhydride (0.5 ml) in 1,2-dichloroethane (5 ml) was refluxed for 21 hours, before work-up as described in the general procedure for pyrrole acylation. The crude product was separated by column chromatography (petroleum ether-ethyl acetate 5:2) to give the *cyclopentapyrrole-6-one* **24c** (75 mg, 82%) as a colourless solid and the *cyclopentapyrrole-4-one* (8 mg, 9%) as a sticky oil.

The *cyclopentapyrrole-6-one* **24c** showed:  $R_f$  0.21 (petroleum ether-ethyl acetate 3:1); mp 106-108 °C;  $\nu_{max}/cm^{-1}$  [KBr] 1738 (C=O), 1666, 1627, 1444, 1404, 1261, 1049, 998, 922 and 862;  $\delta_H$  7.98 (2H, d,  $J$  8.3, 2'- and 6'-H), 7.23 (2H, d,  $J$  8.3, 3'- and 5'-H), 5.89 (1H, s, 3-H), 2.86 (1H, dd,  $J$  16.9 and 6.7, 4- $H_\alpha$ ), 2.82-2.75 (1H, m, 5-H), 2.51 (3H, s, 2-Me), 2.33 (3H, s, *Ts*-Me), 2.21 (1H, dd,  $J$  16.9 and 2.2, 4- $H_\beta$ ) and 1.19 (3H, d,  $J$  7.4, 5-Me);  $\delta_C$  190.8 (C=O), 155.9, 146.3, 145.3, 136.1, 133.5 (all C), 129.9 (2'- and 6'-CH), 127.8 (3'- and 5'-CH), 110.1 (3-CH), 47.3 (5-CH), 29.1 (4-CH<sub>2</sub>), 21.7 (*Ts*-Me), 17.2 (Me) and 15.7 (Me);  $m/z$  (APCI) 304 ( $M^+ + H$ , 100%) [Found:  $M^+ + H$ , 304.1003.  $C_{16}H_{18}NO_3S$  requires 304.1002].

The *cyclopentapyrrole-4-one* showed:  $R_f$  0.13 (petroleum ether-ethyl acetate 3:1);  $\nu_{max}/cm^{-1}$  [film] 1694 (C=O), 1597, 1538, 1493, 1428, 1259, 1164, 1089 and 1026;  $\delta_H$  7.66 (2H, d,  $J$  8.3, 2'- and 6'-H), 7.30 (2H, d,  $J$  8.3, 3'- and 5'-H), 6.00 (1H, s, 3-H), 3.43 (1H, dd,  $J$  18.1 and 6.5, 6- $H_\alpha$ ), 2.90-2.82 (1H, m, 5-H), 2.77 (1H, dd,  $J$  18.1 and 2.2, 6- $H_\beta$ ), 2.39 (3H, s, 2-Me), 2.27 (3H, s, *Ts*-Me) and 1.25 (3H, d,  $J$  7.5, 5-Me);  $\delta_C$  199.7 (C=O), 159.7, 146.0, 138.1, 135.6 (all C), 130.4 (2'- and 6'-CH), 128.1 (C), 127.1 (3'- and 5'-CH), 105.2 (3-CH), 46.3 (5-CH), 32.8 (6-CH<sub>2</sub>), 21.8 (*Ts*-Me), 16.9 (Me) and 14.6 (Me);  $m/z$  (APCI) 304 ( $M^+ + H$ , 100%) [Found:  $M^+ + H$ , 304.1001.  $C_{16}H_{18}NO_3S$  requires 304.1002].



***trans*- and *cis*-4,5-Dihydro-4,5-dimethyl-2-phenylcyclopenta[*b*]pyrrol-6(1*H*)-one (25)**

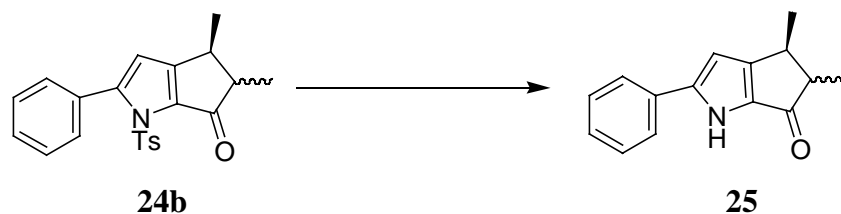

***trans* and *cis*-4,5-Dihydro-4,5-dimethyl-2-phenyl-1-cyclopenta-*b*]pyrrol-6(1*H*)-one 25:** A solution of the *N*-tosyl cyclopenta[*b*]pyrrolone **24b** (30 mg, 0.08 mmol) as a 6:1 ratio (*trans/cis*) in 10 M aqueous sodium hydroxide (5 ml) and methanol (5 ml) was refluxed for 5 h then cooled and the bulk of the methanol evaporated. The aqueous residue was acidified to pH 6 using 1 M hydrochloric acid then extracted with ether (2 x 50 ml). The combined extracts were dried (MgSO<sub>4</sub>), filtered and evaporated. The residue was purified by column chromatography [petrol-EtOAc, 3:1] to give the *cyclopenta*[*b*]pyrrol-6-one **25** (17 mg, 95%) as a colourless solid and a 6:1 mixture of *trans* and *cis* isomers, which showed m.p. 168-171 °C, *R*<sub>f</sub> 0.24 [petrol-EtOAc, 3:1],  $\nu_{\max}$  (CHCl<sub>3</sub>) 3193, 1653, 1365, 1455, 1290, 1266 cm<sup>-1</sup>,  $\delta_{\text{H}}$  (CDCl<sub>3</sub>, 400 MHz) 1.16 (0.43 H, d, *J* 7.2 Hz, 5-Me), 1.19 (0.43 H, d, *J* 7.8 Hz, 4-H), 1.29 (2.57 H, d, *J* 7.4 Hz, 4-Me), 1.32 (2.57 H, d, *J* 7.1 Hz, 5-Me), 2.47 (0.86 H, qd, *J* 7.4 and 2.6 Hz, 4-H), 2.75 (0.86 H, qd, *J* 7.1 and 2.6 Hz, 5-H), 3.06 (0.14 H, app. quintet, *J* ca. 7.4 Hz, 4-H), 3.31 (0.14 H, app. quintet, *J* ca. 7.0 Hz, 5-H), 6.41-6.42 (1H, m, 3-H, both isomers), 7.25-7.28 (1H, m), 7.34-7.38 (2H, m), 7.76-7.78 (2H, m)  $\delta_{\text{C}}$  (CDCl<sub>3</sub>, 100 MHz) *trans*-isomer: 15.3, 19.6 (both Me), 37.7 (4-CH), 56.5 (5-CH), 102.4 (3-CH), 125.7 (2 x CH), 128.4 (CH), 128.9 (2 x CH), 131.7, 133.1, 146.7, 157.9 (all C), 193.9 (CO) [the *cis*-isomer could be identified by  $\delta_{\text{C}}$  12.3, 16.9 (both Me) and 32.1 (4-CH)], *m/z* (APCI) 226 (*M*<sup>+</sup> + *H*, 100%). [Found: *M*<sup>+</sup> + *H*, 226.1226. C<sub>15</sub>H<sub>16</sub>NO requires 226.1226].
